## 1 **Alternate primers for whole-genome SARS-CoV-2 sequencing**

2 Matthew Cotten\*, Dan Lule Bugembe, Pontiano Kaleebu, My V.T. Phan

3

4

5 Author affiliations: UK Medical Research Council–Uganda Virus Research Institute  
6 and London School of Hygiene and Tropical Medicine Uganda Research Unit,  
7 Entebbe, Uganda (D. Bugembe, P. Kaleebu, M. Cotten); Uganda Virus Research  
8 Institute, Entebbe (P. Kaleebu); Erasmus Medical Center, Rotterdam, the  
9 Netherlands (M.V.T. Phan); UK Medical Research Council–University of Glasgow  
10 Centre for Virus Research, Glasgow, Scotland, UK (M. Cotten)

11 \*Correspondence to Matthew Cotten, MRC/UVRI & LSHTM Uganda Research  
12 Unit, Entebbe, Uganda email: matthew.cotten@lshtm.ac.uk

13

### 14 **Abstract**

15 As the world is struggling to control the novel Severe Acute Respiratory Syndrome  
16 Coronavirus 2 (SARS-CoV-2), there is an urgency to develop effective control measures.  
17 Essential information is encoded in the virus genome sequence with accurate and complete  
18 SARS-CoV-2 sequences essential for tracking the movement and evolution of the virus and  
19 for guiding efforts to develop vaccines and antiviral drugs. While there is unprecedented  
20 SARS-CoV-2 sequencing efforts globally, approximately 19 to 43% of the genomes  
21 generated monthly are gapped, reducing their information content. The current study  
22 documents the genome gap frequencies and their positions in the currently available data  
23 and provides an alternative primer set and a sequencing scheme to help improve the quality  
24 and coverage of the genomes.

25 **Keywords:** SARS-CoV-2; COVID-19, primers; next generation sequencing;

26

## 27 **Introduction**

28        Since the first report on 30<sup>th</sup> December 2019 in Wuhan China and the WHO declaration  
29 of the pandemic on 12<sup>th</sup> March 2020, the novel Severe Acute Respiratory Syndrome  
30 Coronavirus 2 (SARS-CoV-2) (1) and the associated disease Coronavirus Disease 2019  
31 (COVID-19) (2)(3) have continued to spread throughout the world, causing >46 million  
32 infections and >1,200,000 death globally (4). The virus genome sequences carry important  
33 information, which can be used to interpret the virus transmission, evolution patterns and  
34 origin tracing. Furthermore, accurate and complete genomic sequences are essential for  
35 monitoring diagnostics and developing novel therapeutics and vaccines. We have seen an  
36 unprecedented amount of virus sequencing with over 130,000 complete or nearly complete  
37 genome sequences of SARS-CoV-2 now available in the GISAID database by the end of  
38 September 2020 (5). Most of the sequences have been generated by next generation  
39 sequencing using targeted amplicon methods. A scan through SARS-CoV-2 genomes from  
40 GISAID with the filter "complete genome" revealed a high frequency of gaps occurring across  
41 the genome, influencing the overall genomics quality and interpretation. Here we describe an  
42 alternate primer scheme for whole-genome sequencing to improve the genome sequence  
43 quality and coverage.

## 44 **Documenting the problem**

45        We retrieved genomes deposited to GISAID in September 2020 (9 months into the  
46 pandemic), using the "complete genome" filter and sorting the genomes by sequencing  
47 platforms information included in the metadata. Figure 1 illustrated the positions across the  
48 30kb genome of every stretch of 200 Ns (N200; nearly the size of an amplicon) in the first  
49 genomes deposited in September 2020 using the Illumina platform (Panel A; N = 3000) versus  
50 MinION platform (Panel B; N = 3000). Histograms of gap frequencies across the genomes are  
51 shown for each platform. The gaps are not randomly distributed but occur with higher  
52 frequency in a subset of positions across the genome. Although genomes generated by the  
53 two platforms (Illumina and MinION) show similar problem regions (nt 8000-11000, and nt

54 19,000-24,000 relative to the reference genome NC\_045512), the patterns are not completely  
55 identical. Given the use of several primer amplification schemes, we suspect the gaps in  
56 coverage may be due to unexpected primer interactions, complicated sequence regions (odd  
57 composition or secondary structure), issues with primer trimming during quality control of read  
58 data, or some combinations of these factors.

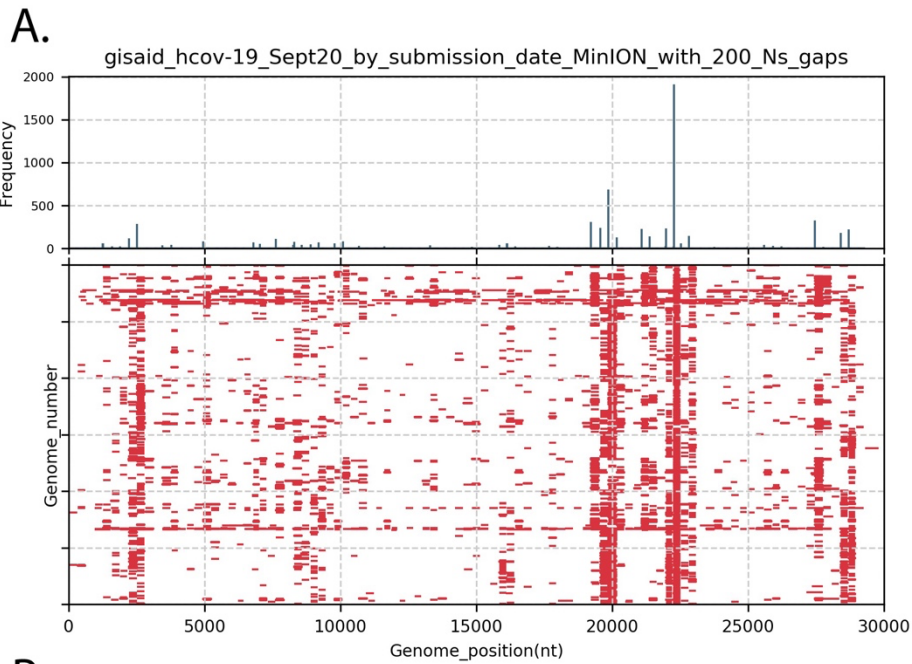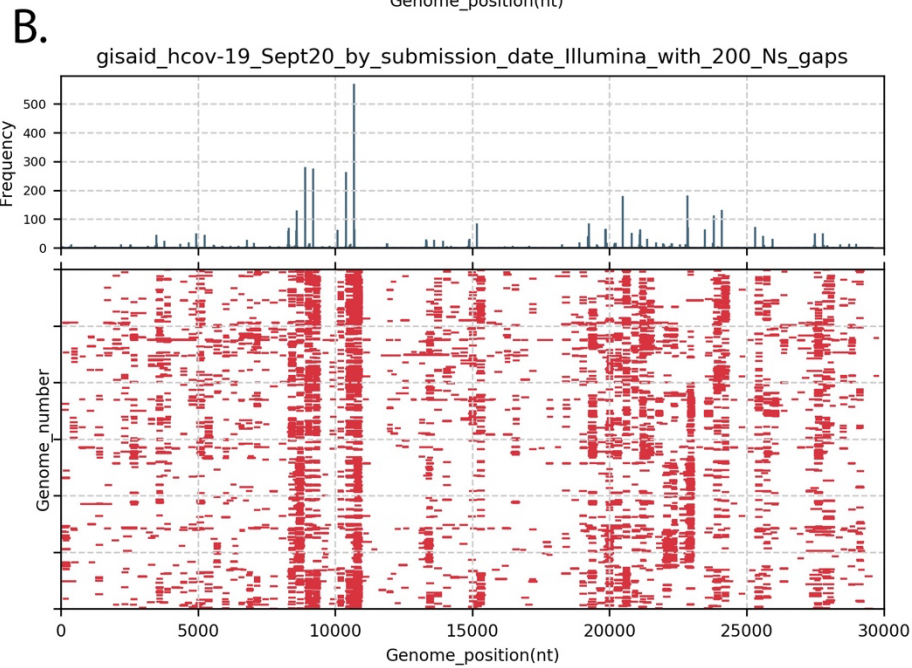

59

60 **Figure 1. (updated graphics) Positions of 200nt gaps across SARS-CoV-2 genomes listed**  
61 **as complete in GISAID.** Genomes deposited in September 2020 (n= 38,228) were retrieved  
62 from GISAID, sorted by sequencing platform (MinION versus Illumina) and genomes with at  
63 least 1 instance of 200N were collected. Panel A present gaps in the first 3000 MinION-  
64 generated genome sequences deposited that contained at least on 200N motif. Gaps  $\geq 200$ nt  
65 in each genome are indicated with red bars. The upper panel histogram shows the frequency  
66 (in 30 nt bins) of gaps  $\geq 200$ nt motifs by start position on genomes. Panel B is the same  
67 analysis of the first 3000 Illumina-generated genome sequences in September 2020 that  
68 contained at least one 200N motif.

69 The phenomenon is unlikely to be due to an isolated set of genomes as we observed  
70 similar N200 frequencies in genomes submitted from each month of the pandemic (Table 1),  
71 suggesting that gaps in coverage is a more general phenomenon. Of note, genomes  
72 generated using Ion Torrent show much lower levels of N200 (Table 1). The very low  
73 frequency of large gaps in the Ion Torrent data may be due to the use of a dedicated alternative  
74 primer set (6). There have been discussions and reports on the SARS-CoV-2 genome  
75 changes due to sequencing errors as well as long gaps in the genomes due to missing  
76 amplicons from the amplicon-approach sequencing (7) (8). Updates of the ARTIC primers  
77 have been presented in late March 2020 to address these issues (9) (10). Additional reports  
78 of longer amplicon methods have been published (11) (12) (14) including methods to use a  
79 subset of ARTIC primers to generate longer amplicons(13).

80 However, the percentage of reported complete genomes in GISAID with 1 or more  
81 N200s continues, with 10,611 (28%) of the 38,228 genomes deposited in September 2020  
82 having 1 or more N200 gaps (Table 1), indicating the challenges remain largely unsolved.

83

84 **Table 1. Frequency of SARS-CoV-2 genomes with 1 or more 200 nt gaps (N200) by**  
85 **month and by sequencing platform.**

| Deposition period | Complete genomes | Genomes with 1 or more N200 <sup>2</sup> | % with 1 or more N200 <sup>3</sup> | Illumina total <sup>4</sup> | Illumina % with N200 <sup>5</sup> | MinION total <sup>6</sup> | MinION % with N200 <sup>7</sup> | Ion Torrent total <sup>8</sup> | Ion Torrent % with N200 <sup>9</sup> | Method unclear <sup>10</sup> | Method unclear % with N200 <sup>11</sup> |
|-------------------|------------------|------------------------------------------|------------------------------------|-----------------------------|-----------------------------------|---------------------------|---------------------------------|--------------------------------|--------------------------------------|------------------------------|------------------------------------------|
| 1Jan20-31Jan20    | 54               | 1                                        | 2                                  | 9                           | 0                                 | 2                         | 0                               | 0                              | 0                                    | 43                           | 2                                        |
| 1Feb20-29Feb20    | 126              | 2                                        | 2                                  | 44                          | 0                                 | 9                         | 0                               | 5                              | 0                                    | 65                           | 4                                        |
| 1Mar20-31Mar20    | 2872             | 559                                      | 19                                 | 1518                        | 16                                | 548                       | 32                              | 35                             | 6                                    | 771                          | 18                                       |
| 1Apr20-30Apr20    | 12411            | 3745                                     | 30                                 | 4970                        | 38                                | 1286                      | 27                              | 264                            | 0                                    | 5424                         | 26                                       |
| 1May20-31May20    | 19787            | 8606                                     | 43                                 | 8634                        | 52                                | 2634                      | 30                              | 529                            | 0                                    | 7990                         | 42                                       |
| 1Jun20-30Jun20    | 21665            | 8723                                     | 40                                 | 7043                        | 36                                | 3844                      | 35                              | 629                            | 2                                    | 10149                        | 47                                       |
| 1Jul20-31Jul20    | 17986            | 4834                                     | 27                                 | 4965                        | 23                                | 1585                      | 33                              | 471                            | 2                                    | 10965                        | 29                                       |
| 1Aug20-31Aug20    | 17276            | 4005                                     | 23                                 | 11074                       | 22                                | 2270                      | 26                              | 486                            | 0                                    | 3446                         | 28                                       |
| 1Sep20-30Sep20    | 38227            | 10611                                    | 28                                 | 22740                       | 23                                | 7973                      | 44                              | 580                            | 1                                    | 6934                         | 28                                       |

86

87 1. Number of genomes with the annotation "complete" retrieved from GISAID  
 88 (<https://www.gisaid.org/>).

89 2. Genomes were sorted by the presence or absence of the sequence N200.

90 3. ((The number of genomes with at least 1 N200)/total number of genomes)\*100.

91 4. Number of genomes in GISAID for this period generated using any of the Illumina methods  
 92 as noted in the GISAID "Sequencing technology metadata" .

93 5. ((The number of Illumina genomes with at least 1 N200)/total number of genomes)\*100.

94 6.,7. Number of genomes in GISAID for this period generated using any of the MinION  
 95 methods as noted in the GISAID "Sequencing technology metadata" and their percentage.

96 8.,9. Number of genomes in GISAID for this period generated using any of the Ion Torrent  
 97 methods as noted in the GISAID "Sequencing technology metadata" and their percentage.

98 10.,11. Number of genomes in GISAID for this period generated using unclear methods as  
 99 noted in the GISAID "Sequencing technology metadata" and their percentage.

100

### 101 **Detailed analysis of gaps.**

102

103 A more focused analysis of the frequent gaps is provided in Figure 2. The gap pattern  
 104 between nt 19,000 and 24,000 (relative to the reference genome NC\_045512) is shown  
 105 for both MinION and Illumina sequences (first 3000 genomes of each deposited in September  
 106 2020 with at least 1 200N motif). For reference the positions of the ARTIC primers (v.1) in the  
 107 region are indicated (middle panel). A histogram of gap start positions (top panel) and the  
 108 individual genome gaps (bottom panel) are also shown.



## A. MinION data

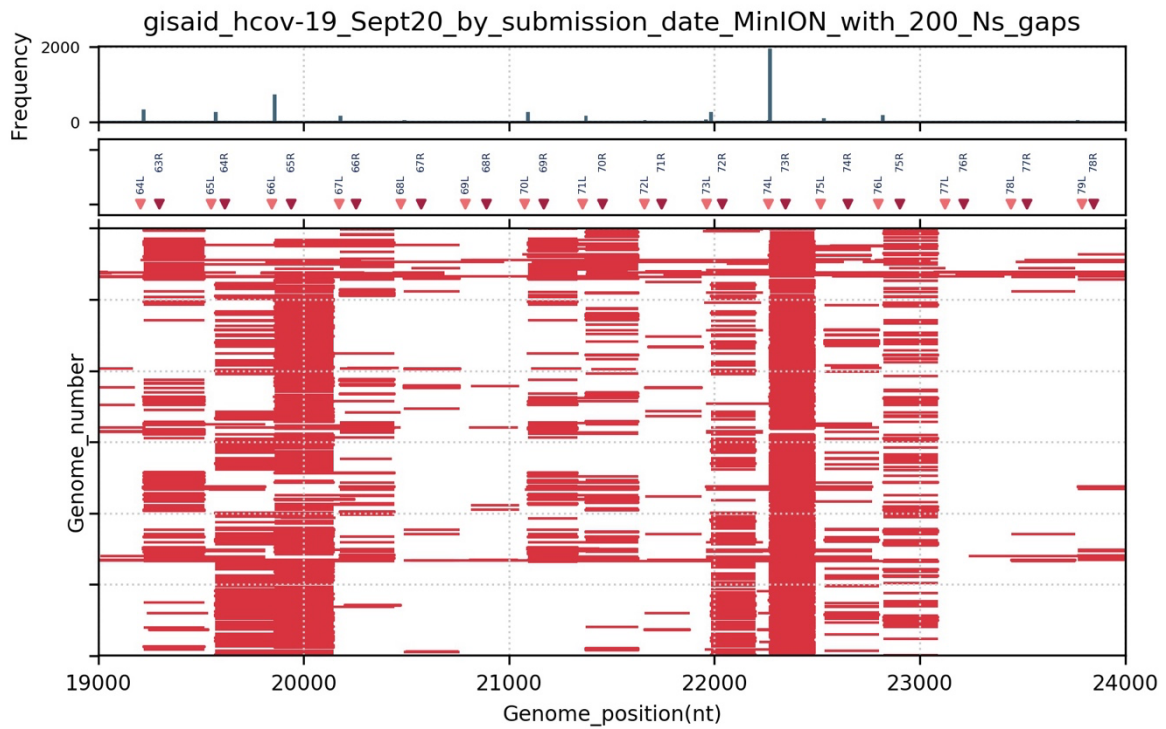

## B. Illumina data

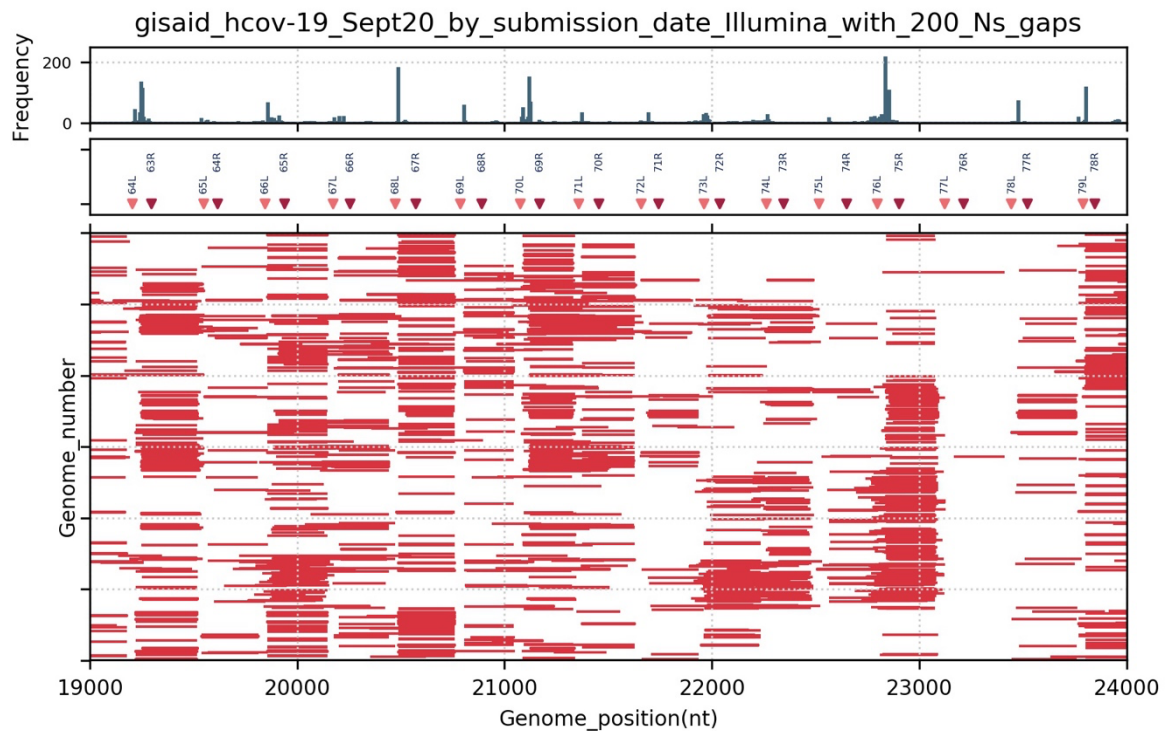

109

110 **Figure 2. Positions of 200nt gaps across SARS-CoV-2 genomes stratified by MinION or**

111 **Illumina, in region nt 19000 to 24000. Genomes deposited in September 2020 as “complete”**

112 **were retrieved from GISAID, sorted by sequencing platform and by the presence of at least**

113 one N200 motif. For clarity only the first 3000 genomes in each set were plotted. Similar to  
114 Figure 1, gaps  $\geq 200$ nt in each genome are indicated with red bars. The upper panel  
115 histogram shows the frequency (in 30 nt bins) of gaps  $\geq 200$ nt motifs by start position on  
116 genome, the middle panel plots the positions of ARTIC v.1 primers in the region (pink = forward  
117 "left" primers, red = reverse "right" primers) . Panel A: MinION-derived genome sequences,  
118 Panel B: Illumina-derived genome sequences.

119

120 The peaks of gap start positions frequently lie between forward primerL from Amplicon  
121 n and reverse primerR from Amplicon n-1, for both MinION and Illumina data. Because of  
122 overlapping amplicons commonly used, if a single amplicon is missing from the sequencing  
123 library (amplicon 74 for example), the resulting gap in coverage would not be the complete  
124 amplicon 74 but would span from the 3' end of the adjacent amplicon 73 (after primer and  
125 quality trimming) to the 5' end of adjacent amplicon 75 (after primer and quality trimming). The  
126 calculated gaps generated by such amplicon loss have a median length of 270.5 nt, which is  
127 close to the the observed median gap length in the MinION data (258 nt) or Illumina data (262  
128 nt) from September 2020. This arrangement is outlined in the Supplementary Material Figure  
129 1, Panel A.

130

### 131 **Alternate primers as a potential solution to avoid gapped genomes.**

132 We explored an alternate set of amplification primers (termed the **Entebbe primers**)  
133 designed using methods we had previously used for MERS-CoV (15), Norovirus (16), RSV  
134 (17) and Yellow Fever virus (18). Important for the design were the amplicon size and the  
135 primer placement. For their implementation, the use of primers for the reverse transcription  
136 step, and the multiplexing of the amplicons in two staggered sets was important for the PCR.  
137 Our experience had suggested an optimum amplicon size of around 1500 bp. The larger  
138 amplicons reduced the total primers content of the reactions but still allowed high reverse  
139 transcription efficiency (which, in our hands, declined beyond 1500 nt). Here we describe

140 primers designed for whole-genome sequencing of SARS-CoV-2, as well as sharing the  
141 detailed laboratory methods that we used for reverse transcription, PCR amplification and  
142 MinION library preparation to successfully sequence the SARS-CoV-2 genome.

A.

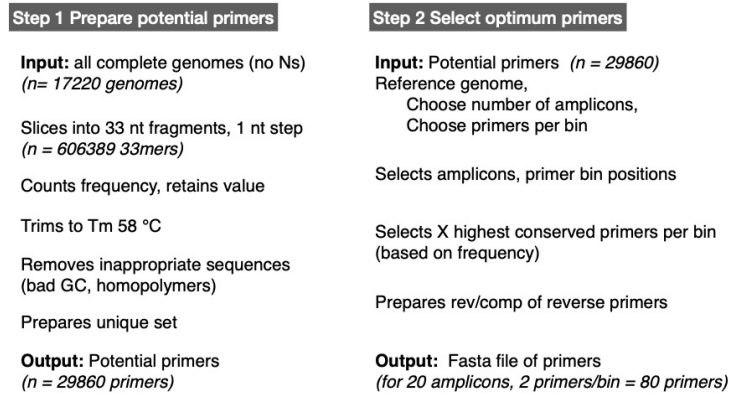

B.

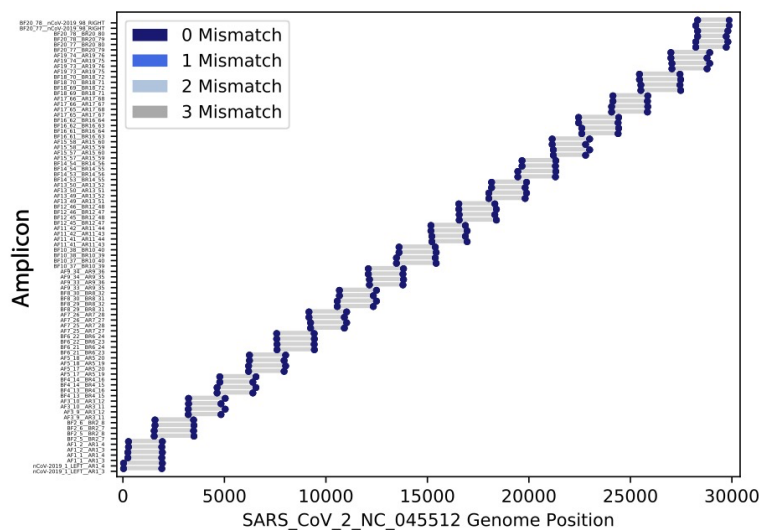

143  
144 **Figure 3. Primer design and amplicon layout.** Panel A. The two main steps involved in  
145 primers generation and selection are shown. Panel B. The layout of the 20 amplicons across  
146 the SARS-CoV-2 genome is shown in lower panel. The blue markers indicate target positions  
147 in the SARS-CoV-2 genome (NC\_045512 used here), the grey bars indicate the resulting  
148 amplicon.  
149



150 Briefly, the primer design (Figure 3A) started with the set of complete SARS-CoV-2  
151 genome sequences available in the GISAID database on 22 June 2020 (N = 21,687). Spaces  
152 and disruptive characters were removed from the sequence IDs and the sequences were  
153 further screened to remove genomes containing gaps of 6Ns or more, resulting in 17,220  
154 clean genome sequences. Next, all sequences were sliced into 33nt strings (33mers), with a  
155 1nt step and 606,389 unique 33mers were generated. The frequency of each 33mer was  
156 counted to identify highly conserved 33mers. This counting method avoids the multiple  
157 sequence alignment step commonly used in primer design and becomes prohibitive with large  
158 and or diverse genome sets. This alignment-free approach allowed us to use all suitable  
159 genome sequences of interest rather than a set that could be conveniently aligned. Finally,  
160 primer-like 33mers sequences were generated by trimming the sequences to a calculated  
161 desired melting temperature and removing any primers greater than 26nt.

162 In the second step we defined forward and reverse primer target regions (bins) for the  
163 amplicons. For SARS-CoV-2, we selected 20 amplicons with an overlap of 300nt, regularly  
164 spaced across the SARS-CoV-2 genome sequence (Figure 3B). We then selected the top  
165 conserved primer sequences (the highest frequency primers) mapping in the 5' or 3' 185nt of  
166 each amplicon. For security, the two highest frequency primers per bin were selected for the  
167 SARS-CoV-2 sequence, this provided some insurance against primer failure either due to  
168 target evolution or unexpected secondary structure. The binning and primer target locations  
169 for the final set of primers are shown in Figure 2 and the final calculated amplicon lengths  
170 were 1495-2093nt.

171 The reverse transcription, PCR amplification and library protocols were modified to  
172 accommodate the new primers. Important changes to note are the following. Reverse  
173 transcription was performed using the reverse primers and reverse transcription at 42°C. The  
174 PCR cycling conditions (using Phusion enzyme) were adjusted for the new  $T_m$ s and an  
175 increased elongation time required for the longer PCR products. Finally, the library purification

176 steps were adjusted to recover longer PCR and library products. A detailed step-by-step  
177 protocol is provided in the supplementary material.

178

### 179 **Testing the performance of primers to sequence SARS-CoV-2 using MinION**

180 We tested the Entebbe primers performance for sequencing SARS-CoV-2 from  
181 nucleic acid extracted from positive samples. The amplicon sizes and genome coverage are  
182 summarised in Figure 4. In particular, panel A and B (Figure 4) illustrate the amplicon  
183 products after the reverse transcription and PCR amplification with the expected sizes of  
184 1400-2000 bp. These amplicons were then pooled and used for library preparation using the  
185 MinION sequencing kits SQK-LSK109. Final libraries were quantified and sequenced using  
186 a MinION Flow Cell (R9.4.1). The resulting read data, after quality and primer and adapter  
187 trimming, were then mapped to the SARS-CoV-2 Wuhan1 reference genome NC\_045512  
188 (Figure 4, panels C and D) to document sequence coverage across the genome. The twenty  
189 individual amplicons are detected in the coverage pattern with small peaks appearing where  
190 amplicons overlap. The coverage is consistent across the genome with no missing amplicons  
191 and the data were readily assembled into good coverage full genomes. Initial experiments  
192 showed that amplicons 2 (spanning nt 2,400) and 16 (spanning nt 23,500) had reduced  
193 yields (Figure 4, panel C). The primer mixes were subsequently adjusted to increase  
194 concentrations of amplicon 1 and 16 primers for reverse transcription and PCR (see detailed  
195 protocol in Supplementary materials), this improved yields relative to the other amplicons  
196 (Figure 4 panel D).

197

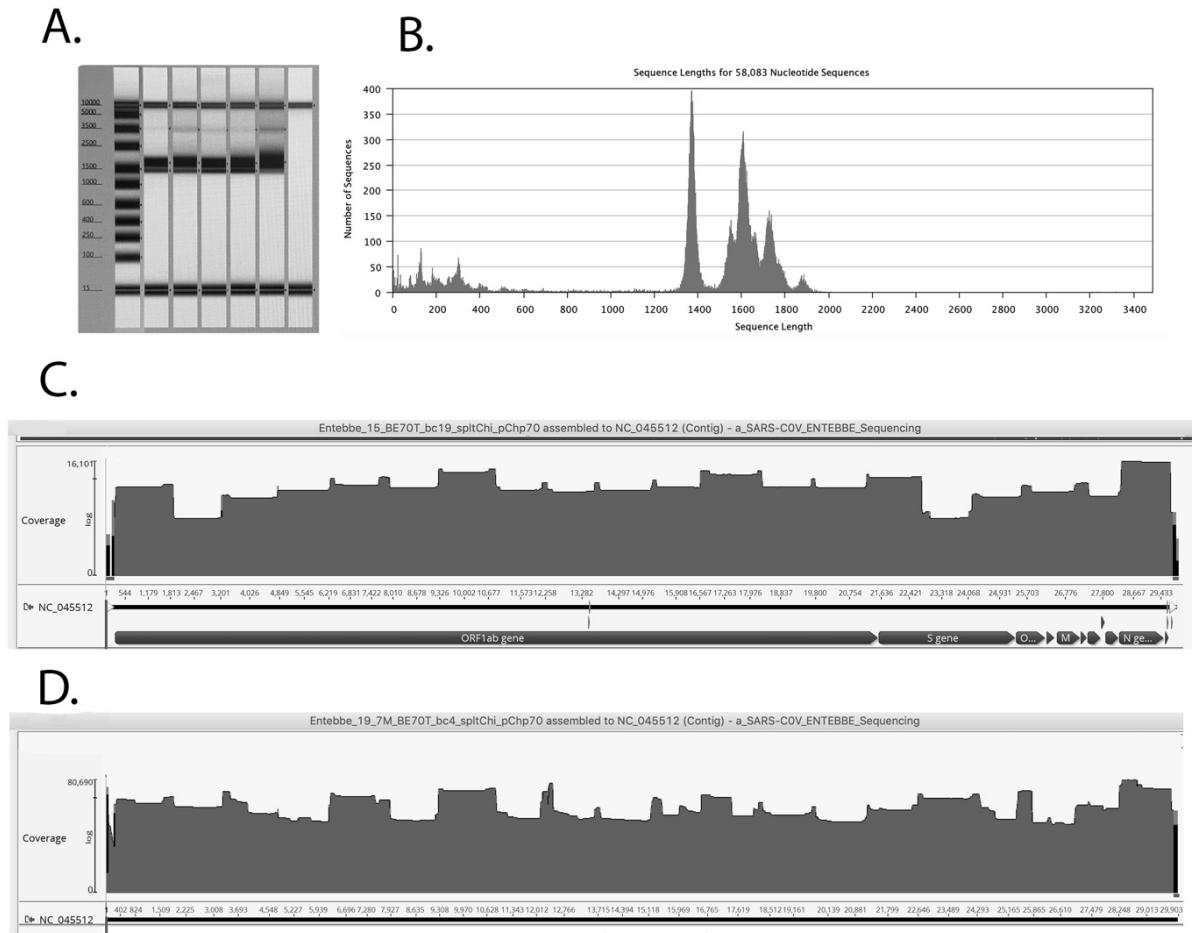

198

199 **Figure 4. Testing the primer performance.** Panel A, PCR product size after pooling of  
200 reaction A and B. Expected sizes of amplicons are from 1500 bp to 2093 bp before primer  
201 trimming. Panel B, MinION reads after quality control, primer, adapter trimming. Panel C,  
202 Reads mapped to SARS-CoV-2 reference genome, before amplicon 2 and 16 primer  
203 boosting. Panel D, Reads mapped to SARS-CoV-2 reference genome, after amplicon 2 and  
204 16 primer boosting.

205 A set of SARS-CoV-2 clinical samples were tested with the Entebbe  
206 primers/protocol. Respiratory swab samples from 111 PCR confirmed cases of SARS-CoV-  
207 2 infection were processed for reverse transcription/PCR using the Entebbe primers and  
208 protocol as described in Supplementary Materials. If sufficient amplicon DNA was generated  
209 after PCR, MinION libraries were prepared, samples were sequenced on the MinION  
210 flowcells and the resulting data were assembled into genomes. Figure 5A shows the results

211 of this validation test. Complete genomes (fraction genome= 1) were obtained from samples  
212 up to Ct 35, 19 samples failed to yield sufficient amplicon DNA after PCR stage (figure 5A,  
213 red markers) and 5 samples yielded genomes with gaps > 842 nt. The PCR failures and the  
214 gapped genomes were not strictly associated with higher Cts and their distribution pattern is  
215 similar to the overall Ct distribution pattern across the set of samples (Figure 5 panel B)  
216 suggesting other factors such as sample quality, extraction method, storage, might be more  
217 critical than Ct in determining sequencing success, at least in samples within the Ct range  
218 tested (up to Ct 37).

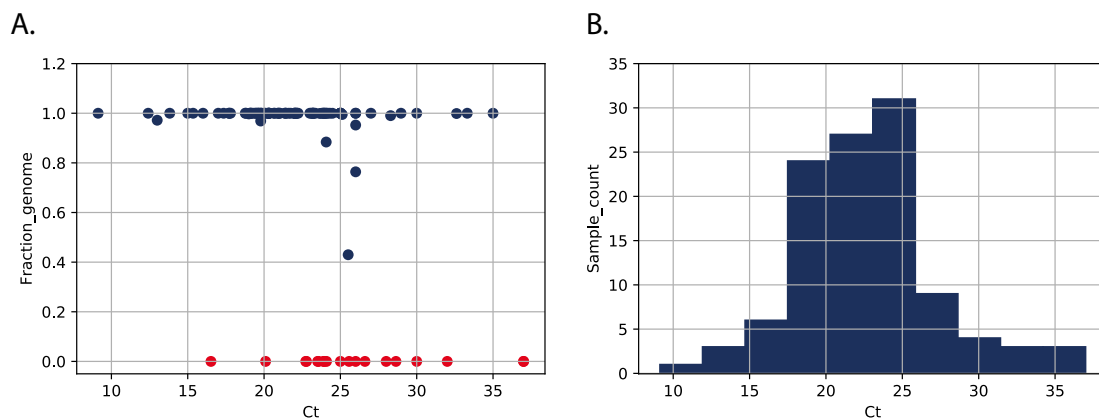

219  
220 **Figure 5. Validation of Entebbe primers. Panel A** plots the genome yield (fraction of  
221 complete genome) as a function of sample Ct. Fraction genome was calculated by number  
222 of nonN nucleotides/29303 (the length, in nt, of NC\_045512 reference genome). Each  
223 marker represents a sample, red markers indicate 19 samples that failed to yield sufficient  
224 DNA for library, 93 that proceeded to library preparation and sequencing (dark blue markers).  
225 **Panel B** is a histogram of the distribution of the 118 sample Cts.

## 226 227 **Conclusions**

228 Given the urgency of controlling the SARS-CoV-2 pandemic and the importance of  
229 having good quality SARS-CoV-2 genomes, we are providing these alternative primers (the  
230 Entebbe primers) with detailed step-by-step laboratory protocols to the community with the

231 hope that they benefit from the new design. The costs and efforts of sequencing SARS-CoV-  
232 2 in the large case numbers that are currently being seen are substantial and if these new  
233 primers result in a higher proportion of gap-less genomes, this will provide added value and  
234 will increase the utility of the resulting data.

235

## 236 **Acknowledgements.**

237 We thank all global SARS-CoV-2 sequencing groups for their open and rapid sharing  
238 of sequence data and GISAID for providing an effective platform for making these data  
239 available. We are grateful to the Oxford Nanopore Technologies and the ARTIC Network for  
240 their support with protocols and analysis software. We thank the Central Public Health  
241 Laboratory, Uganda especially Isaac Ssewanyana, Patrick Semanda, Susan N. Nabadda for  
242 their support with SARS-CoV-2 samples.

243 We acknowledge the support of the Uganda Ministry of Health and its COVID-19  
244 Scientific Advisory Committee, the National COVID-19 Task Force, and the staff of the  
245 Emerging and Reemerging Infections Department of the Uganda Virus Research Institute, and  
246 the US Centers for Disease Control and Prevention. The SARS-CoV-2 diagnostic and  
247 sequencing award is jointly funded by the UK MRC and the UK DFID under the MRC–DFID  
248 Concordat agreement (grant agreement no. NC\_PC\_19060) and is also part of the European  
249 and Developing Countries Clinical Trials Partnership 2 program supported by the European  
250 Union. The diagnostics were also supported by the UK Research and Innovation/MRC, the  
251 Global Fund, the Government of Uganda, the Islamic Development Bank, the World Health  
252 Organization, GAVI, the US Centers for Disease Control and Prevention, and the Jack Ma  
253 Foundation, among others. M.V.T.P. was supported by a Marie Skłodowska-Curie Individual  
254 Fellowship, funded by European Union’s Horizon 2020 research and innovation programme  
255 (grant agreement no. 799417). The Uganda Medical Informatics Centre high performance  
256 computer was supported by the UK MRC (grant no. MC\_EX\_MR/L016273/1) to P.K. The study

257 is supported by a Wellcome Epidemic Preparedness–Coronavirus grant, jointly funded by the  
258 Wellcome Trust and UK DFID (grant agreement no. 220977/Z/20/Z) awarded to M.C. This  
259 study was approved by the UVRI Research and Ethics Committee (approval no. 00001354,  
260 study reference no. GC/127/20/04/771).

## 261 **References**

- 262 1. Edward C. Holmes, Yong-Zhen Zhang EC. Initial genome release of novel coronavirus  
263 <http://virological.org/t/initial-genome-release-of-novel-coronavirus/319>. Virological.org  
264 [Internet]. 2020; Available from: <http://virological.org/t/initial-genome-release-of-novel->  
265 [coronavirus/319](http://virological.org/t/initial-genome-release-of-novel-coronavirus/319)
- 266 2. Li Q, Guan X, Wu P, Wang X, Zhou L, Tong Y, et al. Early Transmission Dynamics in  
267 Wuhan, China, of Novel Coronavirus–Infected Pneumonia. *N Engl J Med*. 2020 Jan  
268 29;NEJMoa2001316.
- 269 3. Yang X, Yu Y, Xu J, Shu H, Xia J, Liu H, et al. Clinical course and outcomes of critically  
270 ill patients with SARS-CoV-2 pneumonia in Wuhan, China: a single-centered,  
271 retrospective, observational study. *Lancet Respir Med*. 2020  
272 Feb;S2213260020300795.
- 273 4. Lauren Gardner et al. Coronavirus COVID-19 Global Cases by Johns Hopkins CSSE.  
274 2020; Available from:  
275 [https://www.arcgis.com/apps/opsdashboard/index.html#/bda7594740fd40299423467b4](https://www.arcgis.com/apps/opsdashboard/index.html#/bda7594740fd40299423467b48e9ecf6)  
276 [8e9ecf6](https://www.arcgis.com/apps/opsdashboard/index.html#/bda7594740fd40299423467b48e9ecf6)
- 277 5. Shu Y, McCauley J. GISAID: Global initiative on sharing all influenza data – from vision  
278 to reality. *Eurosurveillance*. 2017 Mar 30;22(13):30494.
- 279 6. Alessandrini F, Caucci S, Onofri V, Melchionda F, Tagliabracci A, Bagnarelli P, et al.  
280 Evaluation of the Ion AmpliSeq SARS-CoV-2 Research Panel by Massive Parallel  
281 Sequencing. *Genes*. 2020 Aug 12;11(8):929.
- 282 7. Nicola De Maio, Conor Walker, Rui Borges, Lukas Weilguny, Greg Slodkowitz, Nick  
283 Goldman. Issues with SARS-CoV-2 sequencing data. Virological.org [Internet]. 2020;  
284 Available from: <https://virological.org/t/issues-with-sars-cov-2-sequencing-data/473>
- 285 8. Page AJ, Mather AE, Le Viet T, Meader EJ, Alikhan N-FJ, Kay GL, et al. Large scale  
286 sequencing of SARS-CoV-2 genomes from one region allows detailed epidemiology  
287 and enables local outbreak management [Internet]. *Epidemiology*; 2020 Sep [cited  
288 2020 Oct 9]. Available from:  
289 <http://medrxiv.org/lookup/doi/10.1101/2020.09.28.20201475>
- 290 9. Josh Quick and Nick Loman. nCoV-2019 Version 3 Amplicon Releas. 2020; Available  
291 from: <https://community.artic.network/t/ncov-2019-version-3-amplicon-release/19>



- 292 10. Tyson JR, James P, Stoddart D, Sparks N, Wickenhagen A, Hall G, et al.  
293 Improvements to the ARTIC multiplex PCR method for SARS-CoV-2 genome  
294 sequencing using nanopore [Internet]. *Genomics*; 2020 Sep [cited 2020 Nov 3].  
295 Available from: <http://biorxiv.org/lookup/doi/10.1101/2020.09.04.283077>
- 296 11. Freed NE, Vlková M, Faisal MB, Silander OK. Rapid and inexpensive whole-genome  
297 sequencing of SARS-CoV-2 using 1200 bp tiled amplicons and Oxford Nanopore Rapid  
298 Barcoding. *Biol Methods Protoc*. 2020 Jan 1;5(1):bpa014.
- 299 12. Eden J-S, Rockett R, Carter I, Rahman H, de Ligt J, Hadfield J, et al. An emergent  
300 clade of SARS-CoV-2 linked to returned travellers from Iran. *Virus Evol*. 2020 Jan  
301 1;6(1):veaa027.
- 302 13. Itokawa K, Sekizuka T, Hashino M, Tanaka R, Kuroda M. Disentangling primer  
303 interactions improves SARS-CoV-2 genome sequencing by multiplex tiling PCR.  
304 Kalendar R, editor. *PLOS ONE*. 2020 Sep 18;15(9):e0239403.
- 305 14. Gonzalez-Reiche AS, Hernandez MM, Sullivan MJ, Ciferri B, Alshammary H, Obla A, et  
306 al. Introductions and early spread of SARS-CoV-2 in the New York City area. *Science*.  
307 2020 May 29;eabc1917.
- 308 15. Cotten M, Lam TT, Watson SJ, Palser AL, Petrova V, Grant P, et al. Full-Genome  
309 Deep Sequencing and Phylogenetic Analysis of Novel Human Betacoronavirus. *Emerg*  
310 *Infect Dis* [Internet]. 2013 May [cited 2020 Aug 29];19(5). Available from:  
311 [http://wwwnc.cdc.gov/eid/article/19/5/13-0057\\_article.htm](http://wwwnc.cdc.gov/eid/article/19/5/13-0057_article.htm)
- 312 16. Cotten M, Petrova V, Phan MVT, Rabaa MA, Watson SJ, Ong SH, et al. Deep  
313 Sequencing of Norovirus Genomes Defines Evolutionary Patterns in an Urban Tropical  
314 Setting. *J Virol*. 2014 Oct 1;88(19):11056–69.
- 315 17. Agoti CN, Otieno JR, Munywoki PK, Mwihuri AG, Cane PA, Nokes DJ, et al. Local  
316 Evolutionary Patterns of Human Respiratory Syncytial Virus Derived from Whole-  
317 Genome Sequencing. Perlman S, editor. *J Virol*. 2015 Apr 1;89(7):3444–54.
- 318 18. Phan MV, Murad SD, van der Eijk AA, Metselaar HJ, Hartog H, Harinck F, et al.  
319 Genomic sequence of yellow fever virus from a Dutch traveller returning from the  
320 Gambia-Senegal region, the Netherlands, November 2018. *Eurosurveillance* [Internet].  
321 2019 Jan 24 [cited 2020 Aug 29];24(4). Available from:  
322 <https://www.eurosurveillance.org/content/10.2807/1560-7917.ES.2019.24.4.1800684>
- 323 19. Oxford Nanopore Technologies. Nanopore Protocol PCR tiling of COVID-19 virus.  
324 2020; Available from: [https://community.nanoporetech.com/protocols/pcr-tiling-ncov/v/PTC\\_9096\\_v109\\_revH\\_06Feb2020](https://community.nanoporetech.com/protocols/pcr-tiling-ncov/v/PTC_9096_v109_revH_06Feb2020)
- 326 20. Josh Quick. nCoV-2019 sequencing protocol. 2020; Available from:  
327 <https://www.protocols.io/view/ncov-2019-sequencing-protocol-bbmuik6w>
- 328 21. Hsin-Ru Chang, Jay Crespo, Kathy Lee, Kathleen McGall, Susan MacWhorter, Paul  
329 Russell, Jeff Schatz, Donna Seid, Criss Walworth, Joe Yu. TaqMan® Assays Shipped  
330 at Ambient Temperature Reduce Environmental Impact and Retain Their Quality and  
331 Stability. Available from: [https://assets.thermofisher.com/TFS-Assets/LSG/brochures/cms\\_081489.pdf](https://assets.thermofisher.com/TFS-Assets/LSG/brochures/cms_081489.pdf)  
[https://assets.thermofisher.com/TFS-Assets/LSG/brochures/cms\\_081489.pdf](https://assets.thermofisher.com/TFS-Assets/LSG/brochures/cms_081489.pdf)

334 **Supplementary Materials: 1. Supplementary Material Figure 1, 2. Detailed protocol, 3. Primer**  
335 **table.**  
336

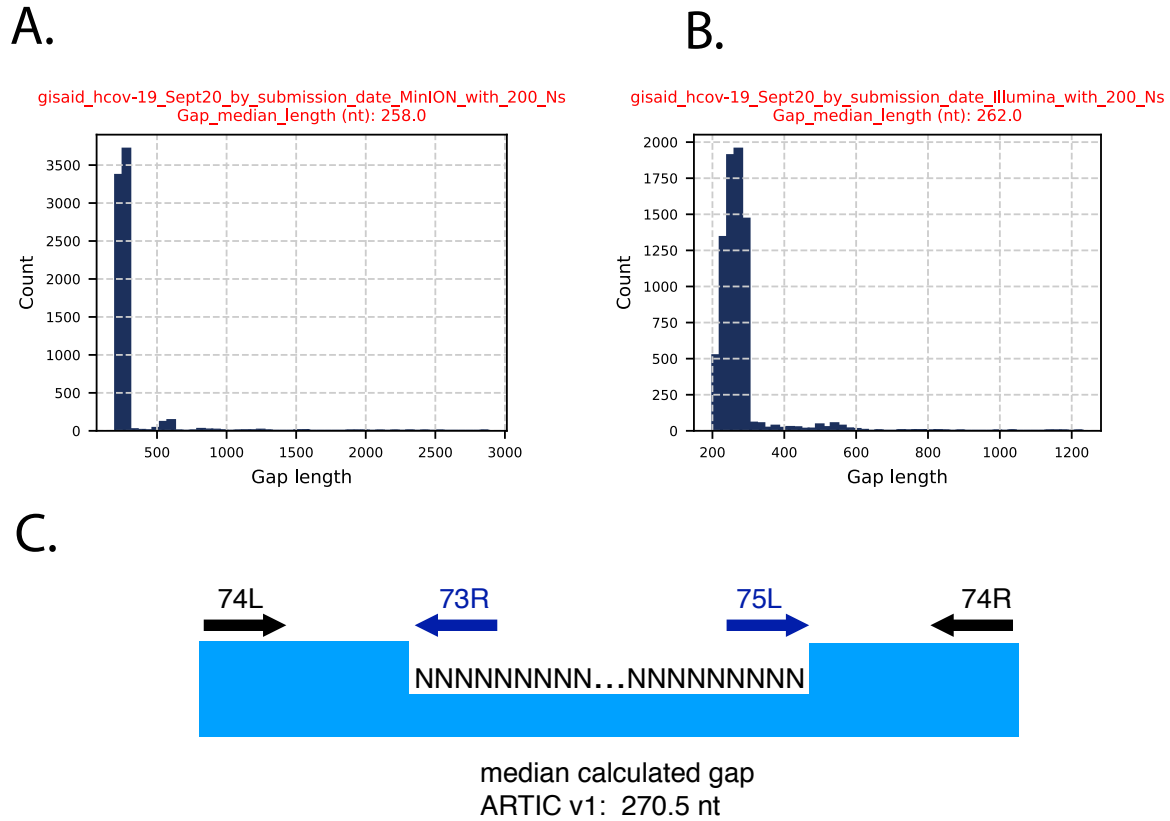

337  
338 Supplementary Material Figure 1. As described in Figure 1, SARS-CoV-2 genomes deposited in  
339 September 2020 (n= 38,228) were retrieved from GISAID, sorted by sequencing platform and  
340 the presence of 200N motifs was monitored. Panel A presents a histogram of gap lengths  
341 present in the first 3000 MinION-generated genome sequences that contained at least one  
342 200N motif. The median length for all gaps was 258 nt. Panel B present the same analysis for  
343 Illumina-generated genome sequences. Panel C presents a typical gap. Because of  
344 overlapping amplicons, if a single amplicon is missing (amplicon 74 for example) from the  
345 sequencing library, the resulting gap in coverage would not be the complete amplicon 74 but  
346 would span from the 3' end of the adjacent amplicon 73 (after primer and quality trimming) to  
347 the 5' end of adjacent amplicon 75 (after primer and quality trimming). The calculated gaps  
348 generated by such amplicon loss have a median length of 270.5 nt, which is close to the the  
349 observed median gap length in the MinION data (258 nt) or Illumina data (262 nt) from  
350 September 2020.  
351

352 **2. Detailed protocol**

353 We acknowledge the Oxford Nanopore Technologies and the ARTIC Network for their  
354 extensive protocols which provided important background details for the method presented  
355 here (19)(20). Potential users are strongly advised to study the original protocols carefully.  
356 The protocol presented here assumes the users has all the ARTIC and ONT background  
357 experience.

358

359 **Detailed protocol for reverse transcription, PCR and sequencing library preparation.**

360 **Practical comments.** Primers were ordered and delivered dry and were dissolved at  
361  $100 \mu\text{M}$  (=  $100 \text{ pmol}/\mu\text{l}$ ) in PCR quality water. Dry shipped primers are reported to have better  
362 stability at room temperature (21). Ideal the primers were allowed to dissolve in PCR grade  
363 water for at least 3 hours at room temperature or overnight at  $4^\circ\text{C}$  before diluting for use (see  
364 below).

365

366 **Prepare the following primer mixes:**

367 **RPM\_A:** 21 primers.  $3 \mu\text{l}$  of  $100 \mu\text{M}$  stock of the following Reverse primers plus PCR  
368 grade water to  $200 \mu\text{l}$  (=  $300 \text{ pmol} \times 21 = 6300 \text{ pmol}/200 \mu\text{l} = 32 \text{ pmol}/\mu\text{l}$ .  $2 \mu\text{l}$  per  $20 \mu\text{l}$  RT  
369 reaction =  $3.2 \text{ pmol}/\mu\text{l} = 3.2 \mu\text{M}$  concentration in reaction) .

370 **Primers in RPM\_A:** nCoV-2019\_1\_LEFT, AR1\_3, AR1\_4, AR3\_11, AR3\_12,  
371 AR5\_19, AR5\_20, AR7\_27, AR7\_28, AR9\_35, AR9\_36, AR11\_43, AR11\_44, AR13\_51,  
372 AR13\_52, AR15\_59, AR15\_60, AR17\_67, AR17\_68, AR19\_75, AR19\_76.

373 **RPM\_B:** 21 primers.  $3 \mu\text{l}$  of  $100 \mu\text{M}$  stock of the following Reverse primers plus PCR  
374 grade water to  $200 \mu\text{l}$ . (=  $300 \text{ pmol} \times 21 = 6300 \text{ pmol}/200 \mu\text{l} = 32 \text{ pmol}/\mu\text{l}$ .  $2 \mu\text{l}$  per  $20 \mu\text{l}$  RT  
375 reaction =  $3.2 \text{ pmol}/\mu\text{l} = 3.2 \mu\text{M}$  concentration in reaction). **Primer Boost:** For Primers BR2\_7,  
376 BR2\_8, BR16\_63, BR16\_64 use  $9 \mu\text{l}$  of  $100 \mu\text{M}$  stock.

377 **Primers in RPM\_B:** BR2\_7, BR2\_8, BR4\_15, BR4\_16, BR6\_23, BR6\_24, BR8\_31,  
378 BR8\_32, BR10\_39, BR10\_40, BR12\_47, BR12\_48, BR14\_55, BR14\_56, BR16\_63,  
379 BR16\_64, BR18\_71, BR18\_72, BR20\_79, BR20\_80, nCoV-2019\_98\_RIGHT.

380

381 **PCR primer mix A (PPM\_A):**  $1.5 \mu\text{l}$  of each primer (forward and reverse primer) plus  
382  $439 \mu\text{l}$  PCR grade water. = 41 primers ( $100 \text{ pmol}/\mu\text{l}$ ) =  $4100 \text{ pmol}$  in  $500 \mu\text{l}$  water =  $8.2 \text{ pmol}/\mu\text{l}$   
383 in the PPM. When  $2 \mu\text{l}$  PPM used per  $25 \mu\text{l}$  PCR reaction =  $0.66 \text{ pmol}/\mu\text{l}$  in reaction (=  $660$   
384 nM).

385 **Primers in PPM\_A:** nCoV-2019\_1\_LEFT, AF1\_1, AF1\_2, AR1\_3, AR1\_4, AF3\_9,  
386 AF3\_10, AR3\_11, AR3\_12, AF5\_17, AF5\_18, AR5\_19, AR5\_20, AF7\_25, AF7\_26, AR7\_27,  
387 AR7\_28, AF9\_33, AF9\_34, AR9\_35, AR9\_36, AF11\_41, AF11\_42, AR11\_43, AR11\_44,  
388 AF13\_49, AF13\_50, AR13\_51, AR13\_52, AF15\_57, AF15\_58, AR15\_59, AR15\_60,  
389 AF17\_65, AF17\_66, AR17\_67, AR17\_68, AF19\_73, AF19\_74, AR19\_75, AR19\_76 .

390 **PCR primer mix B (PPM\_B):** 1.5  $\mu$ l of each primer (forward and reverse primer) plus  
391 439  $\mu$ l PCR grade water = 41 primers (100 pmol/ $\mu$ l) = 4100 pmol in 500  $\mu$ l water = 8.2 pmol/ $\mu$ l  
392 in the PPM. When 2  $\mu$ l PPM used per 25  $\mu$ l PCR reaction = 0.66 pmol/ $\mu$ l in reaction (= 660  
393 nM). **Primer Boost:** for primers BF2\_5, BF2\_6, BR2\_7, BR2\_8, BF16\_62, BF16\_61,  
394 BR16\_63, BR16\_64, use 4.5  $\mu$ l of 100  $\mu$ M stock

395  
396 **Primers in PPM\_B:** BF2\_5, BF2\_6, BR2\_7, BR2\_8, BF4\_13, BF4\_14, BR4\_15,  
397 BR4\_16, BF6\_21, BF6\_22, BR6\_23, BR6\_24, BF8\_29, BF8\_30, BR8\_31, BR8\_32, BF10\_37,  
398 BF10\_38, BR10\_39, BR10\_40, BF12\_45, BF12\_46, BR12\_47, BR12\_48, BF14\_53,  
399 BF14\_54, BR14\_55, BR14\_56, BF16\_61, BF16\_62, BR16\_63, BR16\_64, BF18\_69,  
400 BF18\_70, BR18\_71, BR18\_72, BF20\_77, BF20\_78, BR20\_79, BR20\_80, nCoV-  
401 2019\_98\_RIGHT.

402

### 403 **1. Set up Reverse Transcription reactions (two reactions per sample).**

404

405 Mix the following components in a 0.2mL 8-strip tube, 1 RT\_A and 1 RT-B reaction per  
406 sample.

407 Component Volume (per sample)

#### 408 **RT\_A Reaction**

409 **Component Volume**

410 RPM\_A 1  $\mu$ l

411 Template RNA 11 $\mu$ l (if using less than 11  $\mu$ l viral RNA adjust to 11 $\mu$ l  
412 with water)

413 Total Volume 12 $\mu$ l

414

#### 415 **RT\_B Reaction**

416 **Component Volume**

417 RPM\_B 1  $\mu$ l

418 Template RNA 11  $\mu$ l (if using less than 11  $\mu$ l viral RNA adjust to 11  $\mu$ l  
419 with water)

420 Total Volume 12  $\mu$ l

421

422 Heat at 65 °C for 5:00 mins, and quickly chill in ice/water bath for at least 1:00 min.

423 

424 Viral RNA input from a clinical sample should be between Ct 18-35. If Ct is between 12-15,  
425 then dilute the sample 100- fold in water, if between 15-18 then dilute 10-fold in water. This  
426 will reduce the likelihood of PCR-inhibition.

427

### 428 Reverse Transcription

429 Add the following to the 12  $\mu$ l annealed template RNA sample:

| 430 Component | Volume (1 reaction) |
|---------------|---------------------|
|---------------|---------------------|

|                              |           |
|------------------------------|-----------|
| 431 SuperScript IV 5X Buffer | 4 $\mu$ l |
|------------------------------|-----------|

|               |           |
|---------------|-----------|
| 432 100mM DTT | 1 $\mu$ l |
|---------------|-----------|

|                              |           |
|------------------------------|-----------|
| 433 RNaseOUT RNase Inhibitor | 1 $\mu$ l |
|------------------------------|-----------|

|                                |           |
|--------------------------------|-----------|
| 434 10mM dNTPs mix (10mM each) | 1 $\mu$ l |
|--------------------------------|-----------|

|                    |           |
|--------------------|-----------|
| 435 SuperScript IV | 1 $\mu$ l |
|--------------------|-----------|

436 (add 8  $\mu$ l mix per reaction)

|                  |            |
|------------------|------------|
| 437 Total Volume | 20 $\mu$ l |
|------------------|------------|

438

### 439 2. Incubate the RT reaction as follows:

440 42 °C 50 minutes

441 70 °C 10 minutes

442 Hold at 4 °C

443

### 444 3. Set up Amplicon PCR

445 In the Mastermix hood set up the multiplex PCR reactions as follows in 0.2mL 8-strip PCR

446 tubes. Prepare one PPM\_A and one PPM\_B mix per sample.

| 447 Component | 1 reaction | 8rxns_ PPM_A_Mix | 8rxns_ PPM_B_Mix |
|---------------|------------|------------------|------------------|
|---------------|------------|------------------|------------------|

|                           |           |            |            |
|---------------------------|-----------|------------|------------|
| 448 5 x Phusion HF buffer | 5 $\mu$ l | 40 $\mu$ l | 40 $\mu$ l |
|---------------------------|-----------|------------|------------|

|                 |             |           |           |
|-----------------|-------------|-----------|-----------|
| 449 10 mM dNTPs | 0.5 $\mu$ l | 4 $\mu$ l | 4 $\mu$ l |
|-----------------|-------------|-----------|-----------|

|                     |             |           |           |
|---------------------|-------------|-----------|-----------|
| 450 Phusion DNA Pol | 0.5 $\mu$ l | 4 $\mu$ l | 4 $\mu$ l |
|---------------------|-------------|-----------|-----------|

|                           |  |  |  |
|---------------------------|--|--|--|
| 451 Primer PPM_A or PPM_B |  |  |  |
|---------------------------|--|--|--|

|                  |           |            |            |
|------------------|-----------|------------|------------|
| 452 (10 $\mu$ M) | 2 $\mu$ l | 16 $\mu$ l | 16 $\mu$ l |
|------------------|-----------|------------|------------|

453 Nuclease-free water            12  $\mu$ l            96  $\mu$ l            96  $\mu$ l  
454 Total                            20  $\mu$ l    per rxn

455

456 Aliquot 20  $\mu$ l per tube PPM\_A\_Mix or PPM\_B\_Mix

457

458 In the extraction and sample addition cabinet add **5 $\mu$ l cDNA** to each tube and mix well by  
459 pipetting.

460

#### 461 **4. Run PCR**

| 462 <b>Step</b>     | <b>Cycles</b> | <b>Temp</b> | <b>Time</b> |
|---------------------|---------------|-------------|-------------|
| 463 Heat Activation | 1             | 98 °C       | 30sec       |
| 464 Denaturation    | 35            | 98 °C       | 15sec       |
| 465 Annealing       | 35            | 63 °C       | 30sec       |
| 466 Extension       | 35            | 72 °C       | 3 min       |
| 467 Polish          | 1             | 72 °C       | 10 min      |
| 468 Hold            |               | 4 °C        | infinite    |

469

470 In post-PCR cabinet: After PCR, for each sample, pool the two reactions in a 1.5 ml  
471 microcentrifuge tube.

472

#### 473 **5. Clean up using AMPure XP beads, Agencourt.**

474 Add an equal volume (1:1) of AMPure XP beads to the sample tube and mix gently by either  
475 flicking or pipetting. E.g. add 50  $\mu$ l AMPure XP bead suspension to a 50  $\mu$ l reaction.

476

477 Pulse centrifuge to collect all liquid at the bottom of the tube.

478

479 Incubate for 5 min at room temperature.

480

481 Place on magnetic rack and for 2 min

482

483 Carefully remove and discard the supernatant, being careful not to touch the bead pellet.

484

485 **Ethanol wash 1:** Add 200 $\mu$ l of room-temperature 70%volume ethanol to the pellet.

486 Carefully remove and discard ethanol, being careful not to touch the bead pellet.

#### 487 **Repeat Ethanol wash**

488 Pulse centrifuge to collect all liquid at the bottom of the tube and carefully remove as much  
489 residual ethanol as possible using a P10 pipette.



490 Open lid, allow to dry briefly (2 min)

491

492 Resuspend pellet in 30 $\mu$ l Elution Buffer (EB, QIAGEN)

493 Mix gently by flicking,

494 Incubate 5 min

495

496 Place on magnet and transfer sample (supernatant) to a clean 1.5mL Eppendorf tube

497 ensuring no beads are transferred into this tube.

498

499 **6. Quantitate** (A Tapestation 4200 analyzer with the D5000 assay kit as well as the Qubit  
500 fluorometer were used.)

501

502 **7. Add Barcodes (Steps 7 onward derived from the Oxford Nanopore Technologies**  
503 **protocol (19)).**

504 Set up the following reaction for each sample:

| 505 | <b>Component</b>                  | <b>Volume</b> |
|-----|-----------------------------------|---------------|
| 506 | DNA amplicons                     | 5 $\mu$ l*    |
| 507 | Nuclease-free water               | 7.5 $\mu$ l   |
| 508 | Ultra II End Prep Reaction Buffer | 1.75 $\mu$ l  |
| 509 | Ultra II End Prep Enzyme Mix      | 0.75 $\mu$ l  |
| 510 | Total Volume                      | 15 $\mu$ l    |

511

512 \*Volumes usually varies based on the DNA concentration. For the 1500bp amplicons and  
513 pool size of appx 8 we have input 50ng and for a pool size of 12 we have input 20ng

514

515 Incubate at room temp (20°C) for 20 min

516 Incubate at 65 °C for 5:00 min

517 Incubate on ice for 1 min

518

519 E7645S/L NEBNext Quick Ligation Module

| 520 | <b>Component</b>             | <b>Volume</b> |
|-----|------------------------------|---------------|
| 521 | End repaired sample          | 15 $\mu$ l    |
| 522 | Barcode vol                  | 2.5 $\mu$ l   |
| 523 | Ultra II Ligation Master Mix | 17.5 $\mu$ l  |
| 524 | Ligation Enhancer            | 0.5 $\mu$ l   |
| 525 | Water                        | 1.5 $\mu$ l   |
| 526 | final volume                 | 35.5 $\mu$ l  |

527

528 Incubate in a thermocycler for 15 minutes at 20°C with heated lid set to 30°C (or off).

529 Incubate at 70 °C for 10 min

530 Incubate on ice for 1 min

531

532 The 70°C incubation is to inactivate the DNA ligase to prevent barcode cross-ligation when  
533 reactions are pooled in the next step.

534

535 Pool all barcoded fragments together into a new 1.5 ml Eppendorf tube.

536

537 **8. Clean up on AMPure XP beads, Agencourt.**

538

539 Add an equal volume (1:1) of SPRI beads to the sample tube and mix gently by either flicking  
540 or pipetting. E.g. add 50 µl SPRI beads to a 50 µl reaction.

541

542 Pulse centrifuge to collect all liquid at the bottom of the tube.

543

544 Incubate for 5 min at room temperature.

545

546 Place on magnetic rack and for 5 min

547

548 Carefully remove and discard the supernatant, being careful not to touch the bead pellet.

549

550 **Ethanol wash 1:** Add 200µl of room-temperature 70%volume ethanol to the pellet.

551 Carefully remove and discard ethanol, being careful not to touch the bead pellet.

552 **Repeat Ethanol wash**

553

554 Pulse centrifuge to collect all liquid at the bottom of the tube and carefully remove as much  
555 residual ethanol as possible using a P10 pipette.

556 Open lid, allow to dry briefly (2 min)

557

558 Resuspend pellet in 30µl Elution Buffer (EB, QIAGEN)

559 Mix gently by flicking

560

561 Incubate 5 min

562

563 Place on magnet and transfer sample (supernatant) to a clean 1.5mL Eppendorf tube  
564 ensuring no beads are transferred into this tube.

565

566 **9. Quantitate as above.**

567

568 **10. Add AMII adapters.**

569

570 AMII adapters ligation reaction:

| 571 <b>Component</b>                    | <b>Volume</b> |
|-----------------------------------------|---------------|
| 572 Barcoded amplicon pools             | 30 $\mu$ l    |
| 573 NEBNext (E60562)                    |               |
| 574 Quick Ligation Reaction Buffer (5X) | 10 $\mu$ l    |
| 575 AMII adapter mix                    | 5 $\mu$ l     |
| 576 Quick T4 DNA Ligase                 | 5 $\mu$ l     |
| 577 Total                               | 50 $\mu$ l    |

578

579 The input of barcoded amplicon pools will depend on the number of barcoded pools and  
580 should be between 40 ng (8 barcodes) and 160 ng (24 barcodes).

581

582 Incubate at room temperature for 15:00 min

583

584 **11. Clean up on AMPure XP beads, Agencourt.**

585

586 **USE SFB instead of Ethanol for two washes \*\*\*CRUCIAL**, Ethanol strips off motor protein  
587 from adapter. You don't want to do this!

588

589 Clean up on AMPure XP beads, Agencourt

590

591 Add an equal volume (1:1) of SPRI beads to the sample tube and mix gently by either flicking  
592 or pipetting. E.g. add 50  $\mu$ l SPRI beads to a 50  $\mu$ l reaction.

593

594 Pulse centrifuge to collect all liquid at the bottom of the tube.

595

596 Incubate for 5 min at room temperature.

597

598 Place on magnetic rack and for 2 min  
599  
600 Carefully remove and discard the supernatant, being careful not to touch the bead pellet.  
601  
602 **SFB washes:** Add 200µl of room-temperature **SFB** to the pellet.  
603 resuspend  
604 collect on magnet  
605 Carefully remove and discard **SFB** being careful not to touch the bead pellet.  
606  
607 **Repeat SFB wash**  
608  
609 Pulse centrifuge to collect all liquid at the bottom of the tube and carefully remove as much  
610 residual **SFB** as possible using a P10 pipette.  
611  
612 **Resuspend pellet in 15 µl Elution Buffer (EB, QIAGEN)**  
613 Mix gently by flicking,  
614 **Incubate 5 min**  
615 Place on magnet and transfer sample (supernatant) to a clean 1.5mL Eppendorf tube  
616 ensuring no beads are transferred into this tube.  
617  
618 **12. Quantitate.**  
619  
620 **13. Proceed to MinION sequencing.**  
621

622 **3. Supplementary material Table 1. Entebbe Primers**

| <b>Amplicon_no</b> | <b>Primer_id</b> | <b>Sequence<sup>1</sup></b> | <b>Position<sup>2</sup></b> |
|--------------------|------------------|-----------------------------|-----------------------------|
| 1                  | AF1_1            | GTCCGGGTGTGACCGAAAG         | 242                         |
| 1                  | AF1_2            | CCTTGTCCCTGGTTTCAACGA       | 274                         |
| 1                  | AR1_3            | TGCGGGAGAAAATTGATCGTACA     | 1894                        |
| 1                  | AR1_4            | GCACAGAATTTTGAGCAGTTTCA     | 1921                        |
| 2                  | BF2_5            | ACGTGCTAGCGCTAACATAGG       | 1540                        |
| 2                  | BF2_6            | GTTGGAGAAGGTTCCGAAGGT       | 1580                        |
| 2                  | BR2_7            | TAGCCTTATTTAAGGCTCCTGCAA    | 3477                        |
| 2                  | BR2_8            | TGCAACACCTCCTCCATGTTTAA     | 3459                        |
| 3                  | AF3_9            | ACAACTGTTGGTCAACAAGACG      | 3220                        |
| 3                  | AF3_10           | CAACAAGACGGCAGTGAGGA        | 3233                        |
| 3                  | AR3_11           | TTGTGTAGATTGTCCAGAATAGGACC  | 4806                        |
| 3                  | AR3_12           | TCCATATGTCATTGACATGTCCACA   | 5014                        |
| 4                  | BF4_13           | TTTGAAGAAGCTGCTCGGTATAT     | 4639                        |
| 4                  | BF4_14           | GAAACCATCTCACTTGCTGGTTC     | 4772                        |
| 4                  | BR4_15           | GGTTTTAGATCTTCGCAGGCAAG     | 6380                        |
| 4                  | BR4_16           | CCATTAGATCTGTGTGGCCAA       | 6534                        |
| 5                  | AF5_17           | CACACCCTCTTTAAGAAAGGAGCTA   | 6190                        |
| 5                  | AF5_18           | TTGTTTGGCATGTTAACAATGCAAC   | 6234                        |
| 5                  | AR5_19           | CAGACGCTGATTTTGCAGATGA      | 7919                        |
| 5                  | AR5_20           | GCACTATCACCAACATCAGACAC     | 7994                        |
| 6                  | BF6_21           | AGGCTTTTGCAAACCTACACAATTG   | 7591                        |
| 6                  | BF6_22           | TATGCTAATGGAGGTAAAGGCTTTTG  | 7574                        |
| 6                  | BR6_23           | CGATAGCTACAATACCACCAGCT     | 9409                        |
| 6                  | BR6_24           | CAATACCACCAGCTACTATAGATGCT  | 9397                        |
| 7                  | AF7_25           | AAGCTGGTGTGGTGTATCTACTAGT   | 9243                        |
| 7                  | AF7_26           | ACCTACCTTGAAGTTCTGTTAGAG    | 9164                        |
| 7                  | AR7_27           | CACTACCAATATGGTACGTCCA      | 10885                       |
| 7                  | AR7_28           | TGAGTAACAACCAGTGGTGTGT      | 11000                       |
| 8                  | BF8_29           | CTGGAGTTCATGCTGGCACA        | 10560                       |
| 8                  | BF8_30           | GTTTTAGCTTGGTTGTACGCTG      | 10664                       |
| 8                  | BR8_31           | TTTGCCCTCTTGTCTCAGATCTA     | 12313                       |
| 8                  | BR8_32           | TGGTATGACAACCATTAGTTTGGCT   | 12466                       |
| 9                  | AF9_33           | CTCAAGAAGCTTATGAGCAGGCT     | 12144                       |
| 9                  | AF9_34           | CAAGCTATAGCCTCAGAGTTTAGTTC  | 12089                       |
| 9                  | AR9_35           | ACGTTGACGTGATATATGTGGTACC   | 13770                       |
| 9                  | AR9_36           | ACGAGGTCTGCCATTGTGTATT      | 13802                       |
| 10                 | BF10_37          | GCGGTGTAAGTGCAGCC           | 13475                       |
| 10                 | BF10_38          | TCGCTTCCAAGAAAAGGACGAA      | 13602                       |
| 10                 | BR10_39          | CTCAATACTTGAGCACACTCATTAGC  | 15406                       |
| 10                 | BR10_40          | GTGACAAGCTACAACACGTTGT      | 15367                       |
| 11                 | AF11_41          | ATTCTATGGTGGTTGGCACAACA     | 15219                       |
| 11                 | AF11_42          | CAATAGCCGCCACTAGAGGAG       | 15173                       |
| 11                 | AR11_43          | TAGTGTAGGTGCACTTAATGGCATT   | 16932                       |
| 11                 | AR11_44          | GGTAAACAACAGCATCACCATAGTC   | 16846                       |
| 12                 | BF12_45          | AACATGTGACTGGACAAATGCTG     | 16566                       |
| 12                 | BF12_46          | ACTGACTTTAATGCAATTGCAACATG  | 16546                       |
| 12                 | BR12_47          | TACAGCAACTAGGTTAACACCTGTAG  | 18374                       |
| 12                 | BR12_48          | CACCCCTCGACATCGAAGC         | 18302                       |

|    |                                 |                                 |       |
|----|---------------------------------|---------------------------------|-------|
| 13 | AF13_49                         | GTGGCAACTTTACAAGCTGAAAATG       | 18025 |
| 13 | AF13_50                         | GACATACCTGGCATACCTAAGGAC        | 18160 |
| 13 | AR13_51                         | GTTTAATGTTGCGCTTAGCCCAA         | 19791 |
| 13 | AR13_52                         | GTAGTCCCAGATCACAGTATTAGCAG      | 19859 |
| 14 | BF14_53                         | CGTGTATAACACGTTGCAATTTAGGT      | 19454 |
| 14 | BF14_54                         | ACTTTGATGGACAACAGGGTGAA         | 19661 |
| 14 | BR14_55                         | CGCGTGGTTTGCCAAGATAATTA         | 21285 |
| 14 | BR14_56                         | CATAACCATCTATTTGTTTCGCGTGG      | 21301 |
| 15 | AF15_57                         | AGCTCATGGGACACTTCGC             | 21203 |
| 15 | AF15_58                         | TTGGAGGTTCCGTGGCTATAAAG         | 21146 |
| 15 | AR15_59                         | CGATTTGTCTGACTTCATCACCTC        | 22770 |
| 15 | AR15_60                         | CTACCGGCCTGATAGATTTTCAG         | 22971 |
| 16 | BF16_61                         | TGCATCTGTTTATGCTTGGAACAG        | 22603 |
| 16 | BF16_62                         | CTCTCTCAGAAACAAAGTGTACGTTG      | 22446 |
| 16 | BR16_63                         | CACTTGCTGTGGAAGAAAGTGA          | 24371 |
| 16 | BR16_64                         | GTTGACCACATCTTGAAGTTTTCCAA      | 24396 |
| 17 | AF17_65                         | GGTGATTGCCCTTGGTGATATTGC        | 24074 |
| 17 | AF17_66                         | CTGTTTTGCCACCTTTGCTCA           | 24138 |
| 17 | AR17_67                         | CCAGCAAAGAAAATAGTTGGCATC        | 25816 |
| 17 | AR17_68                         | CGTAACAATTAGTATGCCAGCAAAGA      | 25830 |
| 18 | BF18_69                         | TCCCTTTCGGATGGCTTATTGTT         | 25514 |
| 18 | BF18_70                         | TGAAATCAAGGATGCTACTCCTTCAG      | 25446 |
| 18 | BR18_71                         | GTTGTACCTCTAACACACTCTTGGTA      | 27451 |
| 18 | BR18_72                         | CTCACAAGTAGCGAGTGTTATCAG        | 27418 |
| 19 | AF19_73                         | ACGCTTTCTTATTACAAATTGGGAGC      | 27045 |
| 19 | AF19_74                         | CGCTGTGACATCAAGGACCT            | 26994 |
| 19 | AR19_75                         | TGGCAATGTTGTTCCCTTGAGGAA        | 28755 |
| 19 | AR19_76                         | CAGCCATTCTAGCAGGAGAAGTT         | 28885 |
| 20 | BF20_77                         | TAGAGTATCATGACGTTTCGTGTTGTT     | 28219 |
| 20 | BF20_78                         | ACCCCGCATTACGTTTGGT             | 28309 |
| 20 | BR20_79                         | TGGCTCTTTCAAGTCCTCCCT           | 29700 |
| 20 | BR20_80                         | GCTCTTCCATATAGGCAGCTCTC         | 29779 |
|    | nCoV-2019_1_LEFT <sup>3</sup>   | ACCAACCAACTTTCGATCTCTTGT        | 31    |
|    | nCoV-2019_98_RIGHT <sup>3</sup> | TTCTCCTAAGAAGCTATTAATAATCACATGG | 29866 |

623 **Footnotes** 1. Sequence listed 5' to 3'.

624 2. Position in SARS-CoV-2 reference genome GenBank NC\_045512

625 3. From original ARTIC primer set V.1 (20).

626
